# Supplementary material
Source: publisher figshare collection journal article supplement (https://gsapubs.figshare.com/ndownloader/files/23319143)
Supplement: Supplementary file 1 [file 23319143]

## Sheet: Sheet1
Table DR2. Jacks River formation detrital U-Pb isotopic data
Grain Name	Atomic Ratios 204Pb/206Pb	206Pb/238U	1s error	207Pb/235U*	1s error*	207Pb/206Pb	1s error	Age 206Pb/238U	2s error	Age 207Pb/235U*	2s error*	Age 207Pb/206Pb	2s error	Discordance 207Pb/206Pb	Discordance 207Pb/235U
MFD002_001	0.00274421	0.200727	0.00463916	2.58083	0.0620587	0.0932505	0.000618223	1179.19	49.7155	1295.15	34.8916	1492.5	25.0979	20.9924	8.95361
MFD002_002C	0.00220702	0.162603	0.00132576	1.64028	0.0160635	0.0731626	0.000396807	971.194	14.6933	985.771	12.3171	1018	21.9715	4.59787	1.4788
MFD002_002R	0.0108099	0.089882	0.00739141	2.51462	0.284033	0.202907	0.0156843	554.821	87.1392	1276.2	157.813	2849.5	251.779	80.5292	56.5256
MFD002_003	0.00477111	0.175929	0.00137905	1.84585	0.019284	0.0760951	0.000525462	1044.66	15.1105	1061.9	13.7138	1097.5	27.6364	4.81435	1.62283
MFD002_004	0.00193738	0.188626	0.00166886	2.06184	0.0209888	0.0792779	0.000399038	1113.89	18.0885	1136.17	13.8726	1179	19.9045	5.52216	1.96096
MFD002_005	0.00133613	0.157942	0.00173808	1.5687	0.019128	0.0720348	0.000378172	945.298	19.3371	957.865	15.0654	986.5	21.3693	4.17657	1.31193
MFD002_006	0.00018742	0.173428	0.00247423	1.80868	0.0268189	0.0756381	0.000305422	1030.94	27.1557	1048.55	19.298	1085.5	16.189	5.02629	1.67936
MFD002_007	0.000763341	0.207072	0.00146698	2.31588	0.0190598	0.0811135	0.000339686	1213.16	15.6589	1217.1	11.6389	1224	16.4539	0.885672	0.323777
MFD002_008	0.0022483	0.163894	0.00146022	1.65365	0.0169046	0.0731777	0.000366677	978.35	16.1647	990.899	12.8949	1018.5	20.2966	3.94203	1.26643
MFD002_009	0.000324918	0.203312	0.0018068	2.26852	0.022238	0.080924	0.000334743	1193.05	19.3437	1202.49	13.7693	1219.5	16.2621	2.16899	0.785414
MFD002_010C	0.000327474	0.160436	0.00116324	1.58404	0.0131915	0.0716084	0.00029329	959.166	12.9171	963.909	10.3402	974.5	16.7015	1.57354	0.492113
MFD002_010R1	0.00116116	0.158996	0.00131835	1.57596	0.0155627	0.0718882	0.000385468	951.166	14.6567	960.731	12.2313	982.5	21.8379	3.18917	0.99553
MFD002_010R2	0.000903571	0.160201	0.00109605	1.60282	0.0140168	0.0725634	0.000395176	957.862	12.1738	971.261	10.9063	1001.5	22.1153	4.35728	1.37952
MFD002_011	0.000581014	0.201221	0.0017981	2.20686	0.0219704	0.0795425	0.000348988	1181.84	19.2842	1183.16	13.8648	1185.5	17.3344	0.308777	0.111404
MFD002_012C	0.000206072	0.345412	0.00347309	5.66873	0.0614228	0.119027	0.000480418	1912.59	33.238	1926.52	18.618	1941.5	14.4375	1.48901	0.723014
MFD002_012R	0.000844923	0.195053	0.00129893	2.15796	0.0238689	0.0802397	0.000708549	1148.65	14.0055	1167.56	15.2907	1202.5	34.806	4.47777	1.61899
MFD002_013	0.00532813	0.155066	0.00134701	1.54099	0.0172341	0.0720744	0.000507597	929.269	15.0261	946.85	13.7264	988	28.6551	5.94439	1.85678
MFD002_014	0.00395291	0.19296	0.00176423	2.12273	0.0223339	0.0797857	0.000415266	1137.36	19.052	1156.17	14.4717	1191.5	20.5459	4.54424	1.62698
MFD002_015	0.00410179	0.14097	0.0019143	1.90555	0.030286	0.0980372	0.000809342	850.118	21.6126	1082.97	21.0571	1587	30.8584	46.4324	21.5015
MFD002_016	0.00141682	0.192194	0.00149745	2.09666	0.0193522	0.0791202	0.000391443	1133.21	16.1833	1147.65	12.6509	1175	19.5766	3.5564	1.25841
MFD002_017	0.00167135	0.191793	0.00173016	2.08974	0.0222194	0.079024	0.000444633	1131.04	18.7027	1145.38	14.5509	1172.5	22.2729	3.53571	1.25194
MFD002_018	0.000985241	0.175388	0.0011339	1.82188	0.0155324	0.0753387	0.000418639	1041.7	12.4314	1053.31	11.1467	1077.5	22.3054	3.32289	1.10243
MFD002_019C	0.00235874	0.204731	0.00303217	2.19018	0.0353934	0.0775881	0.000501334	1200.65	32.408	1177.86	22.4051	1136	25.7166	-5.69084	-1.93432
MFD002_019R1	0.00151674	0.176537	0.00155139	1.91582	0.0289259	0.0787073	0.000966179	1048	16.9888	1086.56	20.0456	1164.5	48.6513	10.0045	3.54876
MFD002_019R2	0.000666498	0.1773	0.00147165	1.84971	0.0172924	0.075665	0.000325387	1052.17	16.1057	1063.27	12.2851	1086	17.2416	3.11501	1.04416
MFD002_020C	0.00208741	0.157353	0.00130207	1.56474	0.0157122	0.0721215	0.000410169	942.021	14.4963	956.297	12.4024	989	23.1401	4.75012	1.4928
MFD002_020R	0.00143775	0.159672	0.00135759	1.58242	0.0160975	0.0718775	0.000401352	954.922	15.0839	963.274	12.6188	982	22.745	2.75741	0.867053
MFD002_021	0.000539893	0.194867	0.00208216	2.09424	0.0240564	0.0779447	0.000328524	1147.65	22.4466	1146.86	15.7265	1145	16.7538	-0.231496	-0.0689204
MFD002_022	0.00395159	0.177395	0.00473184	2.77355	0.141778	0.113395	0.00494254	1052.69	51.7096	1348.38	74.897	1854.5	157.527	43.2358	21.9288
MFD002_023	0.000792795	0.189858	0.00140733	2.04723	0.0181709	0.0782056	0.000381727	1120.57	15.2398	1131.32	12.073	1152	19.3786	2.72853	0.950177
MFD002_024	0.000830275	0.202667	0.00163064	2.39367	0.0218575	0.0856604	0.000369795	1189.59	17.4684	1240.65	13.0369	1330.5	16.7056	10.5906	4.1151
MFD002_025	0.00296337	0.189038	0.00157777	2.08019	0.0225505	0.0798091	0.000552006	1116.13	17.096	1142.24	14.8126	1192	27.3024	6.36521	2.28615
MFD002_026C	0.00186236	0.18889	0.00143329	2.0426	0.0179194	0.078428	0.000345236	1115.33	15.5334	1129.77	11.9245	1157.5	17.4635	3.64363	1.27865
MFD002_026R	0.00146925	0.187307	0.00299013	2.16515	0.0364022	0.0838367	0.000441899	1106.73	32.4276	1169.87	23.2212	1288.5	20.5205	14.1069	5.39671
MFD002_027	0.000481248	0.139616	0.00314448	1.4711	0.0354337	0.0764203	0.000651885	842.461	35.5243	918.535	28.9113	1106	34.0971	23.8281	8.28216
MFD002_028C	0.00153368	0.185235	0.00159783	2.0545	0.024443	0.080442	0.000659006	1095.47	17.3687	1133.74	16.1853	1207.5	32.2669	9.27754	3.3749
MFD002_028R	0.00164607	0.180491	0.00261168	2.08861	0.0365617	0.0839265	0.000826526	1069.62	28.4913	1145.01	23.897	1290.5	38.3313	17.1157	6.58398
MFD002_029	0.00188217	0.181217	0.00147167	1.92725	0.0183793	0.0771326	0.000385528	1073.58	16.0526	1090.53	12.71	1124.5	19.9245	4.52788	1.55391
MFD002_030	0.00233136	0.192394	0.00186232	2.1581	0.0239678	0.081354	0.000442823	1134.29	20.1201	1167.6	15.3531	1230	21.3658	7.78101	2.8527
MFD002_031	0.000819101	0.181313	0.00147211	1.91358	0.0179155	0.0765449	0.000356741	1074.11	16.0561	1085.78	12.4482	1109	18.6232	3.14601	1.07465
MFD002_032C	0.00309511	0.167443	0.00162352	1.76256	0.02049	0.0763438	0.000489503	997.977	17.9166	1031.74	15.0059	1104	25.6369	9.60351	3.27206
MFD002_032R1	0.0014626	0.169219	0.0013821	1.73885	0.0170022	0.0745267	0.000400546	1007.77	15.2308	1022.98	12.567	1055.5	21.6475	4.52179	1.48704
MFD002_032R2	0.0019953	0.170375	0.00151601	1.75247	0.0185155	0.0746009	0.000424862	1014.14	16.689	1028.02	13.6142	1057.5	22.9319	4.09987	1.35005
MFD002_033	0.00520977	0.172865	0.00125537	1.81574	0.0196619	0.0761808	0.000611828	1027.85	13.792	1051.1	14.1306	1099.5	32.1371	6.51702	2.21224
MFD002_034	0.00361546	0.170363	0.00188959	1.78161	0.0249874	0.0758464	0.000650892	1014.08	20.7984	1038.71	18.1602	1091	34.378	7.05044	2.3716
MFD002_035C	0.00273568	0.174489	0.0014682	1.80765	0.017743	0.0751356	0.000379648	1036.76	16.1064	1048.18	12.7924	1072	20.3001	3.28695	1.08885
MFD002_035R	0.00358158	0.170559	0.00125092	1.80707	0.0227288	0.0768423	0.000785072	1015.16	13.7701	1047.97	16.376	1117	40.7714	9.11765	3.1309
MFD002_036C	0.0019094	0.185302	0.00136213	2.06349	0.0192789	0.0807645	0.000465658	1095.84	14.8072	1136.72	12.7392	1215.5	22.6813	9.84457	3.59623
MFD002_036R	0.00558918	0.173972	0.00358244	3.29619	0.243571	0.137415	0.00974895	1033.92	39.282	1480.08	111.983	2194.5	246.606	52.8857	30.144
MFD002_037	0.00499486	0.168942	0.00151006	1.79807	0.0219754	0.0771913	0.000643282	1006.25	16.6439	1044.71	15.8861	1126	33.2131	10.6353	3.68136
MFD002_038	0.00380309	0.100962	0.00100075	0.880186	0.0111582	0.0632291	0.000499585	620.022	11.7136	641.051	12.0156	715.5	33.5697	13.3442	3.28037
MFD002_039	0.0012258	0.167728	0.00136657	1.71071	0.0161795	0.0739722	0.000355199	999.548	15.0789	1012.5	12.0845	1040.5	19.3838	3.93576	1.27895
MFD002_040	0.000903775	0.165739	0.00131442	1.68013	0.0155868	0.073522	0.000353813	988.559	14.5286	1000.98	11.7754	1028	19.4647	3.83667	1.24098
MFD002_041	0.00151708	0.172368	0.00159243	1.79094	0.0186224	0.0753571	0.000359481	1025.11	17.5	1042.11	13.5045	1078	19.1472	4.90635	1.63174
MFD002_042	0.00289301	0.158091	0.00133237	1.58828	0.0163271	0.072865	0.000428784	946.128	14.8241	965.574	12.7694	1010	23.8649	6.32396	2.01392
MFD002_043	0.0013202	0.195704	0.00157275	2.13116	0.019926	0.0789798	0.000377336	1152.16	16.9467	1158.9	12.8817	1171.5	18.9141	1.6506	0.581691
MFD002_043	0.0013202	0.195457	0.00157161	2.12848	0.0199088	0.0789798	0.000377336	1150.83	16.9379	1158.03	12.8817	1171.5	18.9141	1.76427	0.621777
MFD002_044	0.00098045	0.19812	0.00188444	2.17023	0.0227987	0.0794466	0.000354187	1165.18	20.2617	1171.49	14.5512	1183	17.6213	1.50664	0.539216
MFD002_045C	0.00315655	0.164176	0.00124974	1.66446	0.01587	0.0735294	0.000422089	979.912	13.8325	995.025	12.0591	1028.5	23.2134	4.72418	1.51892
MFD002_045R	0.00278551	0.164882	0.00120029	1.75765	0.0264447	0.0773142	0.00101788	983.818	13.2774	1029.93	19.3804	1129	52.4515	12.8594	4.47742
MFD002_046	0.00064834	0.18168	0.00164004	1.93984	0.019557	0.0774384	0.000347543	1076.11	17.8809	1094.89	13.4641	1132.5	17.8683	4.97912	1.71477
MFD002_047C	0.0114228	0.131316	0.0046758	2.02251	0.105744	0.111705	0.00427356	795.344	53.1753	1123.05	69.8295	1827	138.753	56.4672	29.1797
MFD002_047R	0.00259761	0.174164	0.00161947	1.85977	0.0209461	0.077446	0.000492058	1034.98	17.7697	1066.85	14.8192	1132.5	25.2983	8.61085	2.98723
MFD002_048C	0.00946244	0.0940966	0.00399015	2.65168	0.258401	0.204383	0.01792	579.701	46.9329	1315.04	138.838	2861.5	285.249	79.7414	55.9177
MFD002_048R	0.000780945	0.164761	0.00165488	1.66167	0.0188054	0.0731458	0.000381314	983.147	18.3044	993.962	14.2967	1017.5	21.1204	3.3762	1.08809
MFD002_049	0.00118446	0.191657	0.00132685	2.20555	0.0200097	0.0834624	0.000489305	1130.31	14.347	1182.74	12.6364	1280	22.8488	11.6946	4.43329
MFD002_050	0.00591373	0.192513	0.00144332	2.08941	0.0228444	0.0787161	0.00062633	1134.94	15.5945	1145.27	14.9603	1165	31.5282	2.58062	0.902735
MFD002_051	0.00157971	0.162084	0.001306	1.60567	0.0148853	0.0718482	0.000329299	968.315	14.481	972.374	11.5674	981.5	18.6677	1.34334	0.417394
MFD002_052	0.00301111	0.189046	0.00141851	2.15873	0.0258662	0.082819	0.000773568	1116.17	15.3712	1167.81	16.5609	1264.5	36.4914	11.7304	4.42162
MFD002_053	0.00199429	0.169194	0.0013908	1.69807	0.0159017	0.0727896	0.000326452	1007.64	15.3269	1007.76	11.933	1008	18.1929	0.035866	0.0116
MFD002_054	0.00636436	0.133829	0.0066316	2.65163	0.221254	0.143702	0.00963858	809.644	75.1862	1315.03	119.456	2272	231.19	64.3642	38.4315
MFD002_055A	0.00365572	0.164099	0.0013861	2.18573	0.0688867	0.0966027	0.00293283	979.484	15.342	1176.45	43.4421	1559.5	113.887	37.1924	16.7421
MFD002_055B	0.00213813	0.16233	0.00141557	1.62572	0.0168086	0.0726351	0.000403365	969.681	15.6918	980.157	12.9579	1003.5	22.5445	3.3701	1.06878
MFD002_056	0.00230576	0.162174	0.00117214	1.60868	0.0140905	0.0719429	0.000355904	968.815	12.9964	973.546	10.9389	984	20.1435	1.54317	0.48592
MFD002_057	0.00364846	0.117713	0.00298315	1.91556	0.0668913	0.118024	0.0028339	717.364	34.3637	1086.47	46.0628	1926.5	86.0335	62.7633	33.9728
MFD002_058	0.00390163	0.159581	0.00135719	1.59257	0.0158224	0.0723794	0.00037164	954.417	15.0806	967.254	12.3554	996.5	20.8653	4.22306	1.32712
MFD002_059C	0.00423048	0.174738	0.00147841	1.7633	0.0183975	0.0731876	0.00044674	1038.13	16.2149	1032.01	13.4749	1019	24.7203	-1.87748	-0.593179
MFD002_059R	0.00455751	0.167454	0.00177077	1.91503	0.0274817	0.0829429	0.000804464	998.037	19.5402	1086.28	19.0546	1267.5	37.8744	21.2594	8.12382
MFD002_060C	0.0018764	0.181222	0.00146302	1.91627	0.0189592	0.076691	0.000438546	1073.61	15.9582	1086.72	13.159	1113	22.8344	3.53886	1.20572
MFD002_060R	0.00553449	0.139388	0.00239316	2.35258	0.105275	0.12241	0.00505711	841.176	27.0507	1228.28	62.7846	1991.5	146.911	57.7617	31.5158
MFD002_061	0.00264629	0.177923	0.00151986	1.85363	0.0191045	0.0755596	0.00043563	1055.59	16.6242	1064.67	13.5495	1083	23.1281	2.53139	0.853246
MFD002_062	0.00457477	0.165203	0.00176292	1.84713	0.0670842	0.0810917	0.00281464	985.597	19.4911	1062.35	47.2916	1223.5	136.381	19.4444	7.22504
MFD002_063	0.00125262	0.222401	0.00171521	2.63285	0.0246425	0.0858596	0.000455236	1294.51	18.0773	1309.8	13.728	1335	20.5047	3.03332	1.16737
MFD002_064	0.00427936	0.193961	0.00168197	2.1329	0.0236647	0.0797543	0.000551889	1142.76	18.1491	1159.47	15.2812	1190.5	27.3233	4.01019	1.4409
MFD002_065C	0.00132047	0.195601	0.00128652	2.13926	0.0178378	0.0793214	0.00040647	1151.61	13.8654	1161.53	11.5059	1180	20.262	2.40604	0.85376
MFD002_065R	0.00124918	0.198468	0.00138219	2.16275	0.0183702	0.0790341	0.000384243	1167.05	14.8603	1169.1	11.7606	1172.5	19.2478	0.465014	0.175139
MFD002_066C	0.00332095	0.177626	0.00157502	1.85404	0.0189976	0.0757026	0.000388628	1053.96	17.2315	1064.81	13.4721	1087	20.5793	3.03984	1.0195
MFD002_066R	0.0122228	0.118891	0.0038852	4.15075	0.426206	0.253206	0.0246355	724.157	44.6897	1664.27	161.439	3204.5	307.602	77.4019	56.4881
MFD002_067	0.000264377	0.150761	0.00132878	1.50551	0.0155179	0.0724257	0.000386955	905.199	14.8782	932.574	12.5381	997.5	21.7111	9.25323	2.93541
MFD002_068	0.00593863	0.17016	0.00128682	1.72204	0.0161275	0.0733982	0.000405404	1012.96	14.17	1016.74	11.9957	1024.5	22.3534	1.12649	0.371374
MFD002_069	0.00166823	0.194667	0.00150113	2.10629	0.01894	0.0784737	0.000362889	1146.57	16.1895	1150.81	12.3439	1158.5	18.3445	1.02957	0.36798
MFD002_070C	0.000457442	0.259692	0.00425354	3.4661	0.0627819	0.0968011	0.000748215	1488.22	43.4598	1519.46	28.3472	1563	28.9869	4.78442	2.05594
MFD002_070R	0.00280423	0.174044	0.00259541	2.68828	0.210901	0.112025	0.00862646	1034.32	28.4693	1325.17	112.918	1832.5	279.047	43.557	21.9483
MFD002_071	0.0102519	0.192674	0.00155882	2.11465	0.0268499	0.0796003	0.000778827	1135.81	16.8393	1153.54	17.4303	1187	38.6468	4.31285	1.53697
MFD002_072	0.00131297	0.171592	0.00150207	2.07651	0.0252641	0.0877678	0.000741487	1020.85	16.5184	1141.03	16.6076	1377	32.488	25.8645	10.5326
MFD002_073	0.0015053	0.162016	0.00258016	1.61376	0.0271698	0.07224	0.000394382	967.942	28.5948	975.52	20.9996	992.5	22.1993	2.47435	0.776786
MFD002_074	0.00184326	0.194427	0.00318242	2.10738	0.0359662	0.0786113	0.000379602	1145.27	34.3047	1151.16	23.3688	1162	19.1457	1.43945	0.511514
MFD002_075	0.00259854	0.190447	0.00309851	2.04782	0.0356209	0.077986	0.00047958	1123.76	33.5129	1131.51	23.5954	1146.5	24.4334	1.98363	0.68531
MFD002_076	0.00136155	0.194563	0.0031844	2.12583	0.0358707	0.0792439	0.000324937	1146.01	34.3222	1157.17	23.1703	1178	16.2188	2.71563	0.964626
MFD002_077C	0.00668463	0.161785	0.00257346	1.63551	0.0283272	0.0733187	0.000502152	966.656	28.5263	983.935	21.7096	1022.5	27.7238	5.46151	1.7561
MFD002_077R	0.00190384	0.162761	0.00266423	1.73674	0.0356693	0.0773896	0.000959594	972.07	29.5066	1022.2	26.2957	1131	49.3839	14.0522	4.90428
MFD002_078	0.00289728	0.191721	0.00304429	2.08629	0.037737	0.0789231	0.000683369	1130.65	32.892	1144.25	24.679	1170	34.2876	3.36295	1.18808
MFD002_079	0.0022143	0.159295	0.00252981	1.58031	0.0264207	0.0719516	0.000375637	952.825	28.1032	962.443	20.6869	984.5	21.2535	3.21735	0.999348
MFD002_080	0.000618777	0.181358	0.00297017	1.94834	0.033283	0.0779158	0.000378221	1074.35	32.3734	1097.82	22.7952	1144.5	19.2945	6.12893	2.1373
MFD002_081	0.00207308	0.15976	0.00250656	2.02642	0.0674861	0.0919942	0.00270171	955.41	27.834	1124.36	44.7843	1467	111.548	34.8732	15.0261
MFD002_082	0.014828	0.175288	0.00287303	1.8304	0.0353753	0.0757344	0.000775225	1041.15	31.4774	1056.37	25.2226	1088	41.0245	4.30637	1.44111
MFD002_083	0.00123283	0.169593	0.0030623	2.04794	0.0457558	0.0875807	0.00115188	1009.83	33.7116	1131.55	30.2579	1373	50.6021	26.4506	10.7568
MFD002_084C	0.00380319	0.17294	0.00304094	1.76875	0.0324557	0.0741772	0.000388742	1028.25	33.3813	1034.01	23.6653	1046	21.139	1.69658	0.556597
MFD002_084R	0.00161868	0.175766	0.0027804	1.84228	0.0308671	0.0760185	0.000419474	1043.77	30.4514	1060.62	21.9341	1095.5	22.0907	4.72217	1.58902
MFD002_085	0.00410093	0.188036	0.0030272	2.03904	0.0348584	0.0786473	0.000451997	1110.69	32.809	1128.58	23.1595	1163	22.7822	4.49774	1.58541
MFD002_086	0.00172449	0.164361	0.0026789	1.65265	0.0280349	0.0729256	0.000342632	980.934	29.6281	990.514	21.3488	1011.5	19.0515	3.02185	0.967187
MFD002_087	0.00665163	0.191094	0.00313847	2.05797	0.0374282	0.0781069	0.00060984	1127.26	33.9261	1134.89	24.7035	1149.5	31.0092	1.93442	0.671765
MFD002_088	0.00210093	0.183959	0.00296693	1.94166	0.0324434	0.0765508	0.000334031	1088.53	32.2672	1095.52	22.2734	1109.5	17.432	1.88977	0.63742
MFD002_089	0.000599999	0.194927	0.00320312	2.10239	0.0352869	0.0782239	0.000267085	1147.98	34.5132	1149.53	22.9666	1152.5	13.5543	0.39262	0.135391
MFD002_090	0.00219542	0.222103	0.00355465	2.64221	0.0434681	0.0862803	0.00032826	1292.94	37.4449	1312.41	24.0915	1344	14.6982	3.79936	1.48369
MFD002_091	0.0172808	0.197382	0.0035664	2.15705	0.0442308	0.0792596	0.00076799	1161.2	38.3429	1167.26	28.2525	1178.5	38.3207	1.46785	0.519337
MFD002_092	0.00497953	0.201735	0.00349584	2.35493	0.062462	0.0846632	0.00169952	1184.6	37.4495	1228.99	37.4592	1307.5	77.944	9.39986	3.61202
MFD002_093	0.000689565	0.180697	0.00292671	1.95207	0.0340724	0.0783507	0.000509403	1070.75	31.9182	1099.1	23.3034	1155.5	25.8013	7.33475	2.57996
MFD002_094	0.00379157	0.208009	0.00333086	2.39547	0.0400237	0.083523	0.000397985	1218.16	35.4995	1241.18	23.7962	1281	18.5723	4.90523	1.85465
MFD002_095	0.000834669	0.138255	0.00251151	1.4657	0.0273472	0.0768888	0.000327013	834.762	28.4152	916.313	22.3982	1118	16.9719	25.3344	8.89997
MFD002_096	0.00368479	0.169057	0.00283141	1.70486	0.0300103	0.0731395	0.000395972	1006.88	31.1871	1010.3	22.4061	1017.5	21.9323	1.04339	0.3386
MFD002_097	0.00184835	0.195538	0.00310466	2.14362	0.0354287	0.0795087	0.000364596	1151.27	33.4366	1162.93	22.7577	1184.5	18.1214	2.80556	1.00314
MFD002_098	0.00216365	0.197421	0.00888321	2.67182	0.121194	0.0981548	0.000560031	1161.42	95.2908	1320.63	65.9429	1589	21.3243	26.909	12.0559
MFD002_099	0.00110215	0.226981	0.00358653	2.67277	0.0434995	0.0854023	0.000332704	1318.62	37.6303	1320.89	23.9094	1324.5	15.0893	0.44426	0.172231
MFD002_100	0.00307304	0.167219	0.002643	1.86156	0.0469621	0.0807403	0.00158705	996.739	29.16	1067.49	33.0554	1215	77.3274	17.9639	6.62753
MFD002_101	0.00315077	0.16408	0.0026143	1.66517	0.0304101	0.0736039	0.000656603	979.379	28.9214	995.296	23.0391	1030.5	36.0642	4.96077	1.59924
MFD002_102	0.00739913	0.199938	0.00374349	4.01595	0.153063	0.145677	0.00483466	1174.95	40.1583	1637.35	61.0394	2295.5	114.105	48.8151	28.2407
MFD002_103	0.00246682	0.177586	0.00281368	1.8215	0.0300772	0.0743908	0.000345646	1053.74	30.7679	1053.17	21.5323	1052	18.7227	-0.165244	-0.0538573
MFD002_104	0.0117138	0.159778	0.00273332	1.57811	0.0320318	0.071634	0.000782197	955.513	30.3486	961.577	25.0746	975.5	44.5139	2.04892	0.630673
MFD002_105	0.0046413	0.19111	0.00304148	2.06629	0.0343715	0.0784162	0.000379214	1127.35	32.8786	1137.65	22.636	1157	19.1885	2.56268	0.905104
MFD002_106	0.00253353	0.144503	0.00336261	1.93827	0.059242	0.0972829	0.00192677	870.046	37.823	1094.35	40.5354	1572.5	74.1755	44.6711	20.4962
MFD002_107	0.00719424	0.224997	0.00393673	4.41969	0.206565	0.142467	0.00617264	1308.18	41.3654	1715.95	75.9578	2257	149.59	42.0388	23.7633
MFD002_108	0.00247174	0.166222	0.00288119	1.80397	0.0385358	0.0787116	0.000982298	991.228	31.8118	1046.84	27.718	1164.5	49.463	14.8795	5.31253
MFD002_109	0.00512563	0.168447	0.00335413	1.93301	0.0629239	0.0832281	0.00214249	1003.52	36.9558	1092.53	43.1044	1274.5	100.408	21.262	8.14724
MFD002_110	0.0196303	0.169562	0.0032074	1.78379	0.0482446	0.0762981	0.00147435	1009.67	35.3077	1039.51	34.891	1102.5	77.2915	8.42037	2.87101
MFD002_111	0.000612542	0.197794	0.00328212	2.14641	0.0366966	0.0787046	0.000323675	1163.42	35.2787	1163.84	23.5465	1164.5	16.2984	0.0928635	0.035993
MFD002_112	0.00333971	0.177864	0.00279096	1.88207	0.032648	0.0767444	0.000567237	1055.26	30.5126	1074.74	22.874	1114.5	29.5063	5.31532	1.81225
MFD002_113	0.00266337	0.192047	0.00311373	2.08938	0.0349975	0.078906	0.000331599	1132.42	33.6322	1145.26	22.8747	1169.5	16.6432	3.17096	1.12193
MFD002_114	0.000503355	0.204533	0.00342341	2.23584	0.0381868	0.0792825	0.000269148	1199.58	36.5897	1192.29	23.8239	1179	13.4254	-1.74592	-0.61152
Notes:
*235U calculated from 238U
Age discordances calculated vs. 207Pb/206Pb and 207Pb/235U as shown
Jack's River formation meta-sandstone (UTM Z 16: 733581mE, 3896959mN)
